# Supplementary material
Source: Elsevier journal article supplement (https://www.sciencedirect.com/science/article/pii/S1885585724000756)
Supplement: mmc1 [file mmc1.pdf]

**SUPPLEMENTARY DATA**

**RESEARCH ALGORITHMS**

**PubMed/MEDLINE search algorithm:** ((Fractional Flow Reserve) OR (Instantaneous wave-free ratio) OR (non-hyperaemic coronary pressure) OR (resting full cycle ratio) OR (diastolic pressure ratio) OR (distal coronary aortic pressure ratio)) AND ((coronary artery disease) OR (percutaneous coronary intervention) OR (coronary revascularization))

**Cochrane/Central search algorithm:** "Fractional flow reserve"

**FURTHER SENSITIVITY ANALYSES**

Secondary analysis for the three coprimary endpoints after excluding prospective non-PSWM adjusted studies.

| <b>Endpoint</b> | <b>HR and 95%CI</b> |
|-----------------|---------------------|
| All-cause death | 0.76 (0.62-0.93)    |
| MI              | 0.80 (0.68-0.94)    |
| MACE            | 0.87 (0.78-0.96)    |

95% CI, 95% confidence interval; HR, hazard ratio; MACE, major adverse cardiovascular events; MI, myocardial infarction; PSWM, propensity score weighted matching.

**Table 1 of the supplementary data.** MACE definitions across included studies

| <b>Study and year</b>                      | <b>MACE definition</b>                                                   |
|--------------------------------------------|--------------------------------------------------------------------------|
| <b>NRSI</b>                                |                                                                          |
| Wrongpraparut et al. 2005 <sup>23</sup>    | Death, MI, TLR                                                           |
| Koo 2008 <sup>24</sup>                     | Cardiac death, MI, TVR                                                   |
| Puymirat 2012 <sup>25</sup>                | Cardiac death, MI, TVR                                                   |
| Di Serafino 2013 <sup>26</sup>             | Death, MI, TVF, CVA                                                      |
| Li 2013 <sup>27</sup>                      | Death, MI, any revascularization                                         |
| Toth 2013 <sup>28</sup>                    | Death, MI, TVR                                                           |
| Di Gioia 2016 <sup>35</sup>                | Death, MI, any revascularization                                         |
| De Backer 2016 <sup>36</sup>               | Death, MI, any revascularization                                         |
| Sawant 2018 <sup>13</sup>                  | Death, MI, stroke, any revascularization                                 |
| Fournier 2018 <sup>37</sup>                | Death, MI, TVR                                                           |
| Lunardi 2019 <sup>11</sup>                 | Cardiac death, MI, any revascularization, disabling stroke               |
| Di Gioia 2020 <sup>14</sup>                | Death, MI, any revascularization, stroke                                 |
| Parikh 2020 <sup>38</sup>                  | Death, MI, any revascularization                                         |
| Adjedj 2022 <sup>41</sup>                  | Death, MI, unplanned revascularization, TLR, stroke, BARC bleeding 3-5   |
| Gerhardt 2023 <sup>44</sup>                | Death, MI, any revascularization,                                        |
| <b>RCT</b>                                 |                                                                          |
| Layland 2015 (FAMOUS-NSTEMI) <sup>30</sup> | Cardiac death, MI, unplanned hospitalization for HF                      |
| Chen 2015 (DK-CRUSH VI) <sup>31</sup>      | Cardiac death, MI, ischemia-driven TVR                                   |
| Park 2015 (DEFER-DES) <sup>32</sup>        | Cardiac death, MI, TLR                                                   |
| Van Nunen 2015 (FAME) <sup>33</sup>        | Death, MI, any revascularization                                         |
| Zhang 2016 <sup>45</sup>                   | Cardiac death, MI, unplanned hospitalization for HF                      |
| Theusen 2018 (FARGO) <sup>12</sup>         | Death, MI, any revascularization, stroke                                 |
| Toth 2019 (GRAFFITI) <sup>10</sup>         | Death, MI, any revascularization, stroke                                 |
| Puymirat 2021 (FLOWER-MI) <sup>5</sup>     | Death, MI, unplanned hospitalization leading to urgent revascularization |
| Rioufol 2021 (FUTURE) <sup>15</sup>        | Death, MI, stroke, unplanned revascularization                           |
| Stables 2022 (RIPCARD-2) <sup>16</sup>     | Death, MI, stroke, unplanned revascularization                           |
| Lee 2022 (FRAME-AMI) <sup>43</sup>         | Death, MI, any revascularization                                         |

Mangiacapra F, et al. *Systematic review and meta-analysis of randomized and non-randomized studies on fractional flow reserve-guided revascularization. Rev Esp Cardiol. 2024*

CVA, cerebrovascular accident; HF, heart failure; MACE, major adverse cardiovascular events; MI, myocardial infarction; TLR, target lesion revascularization; TVR, target vessel revascularization).

The bibliographic citations included in the supplementary data correspond to the reference list included in the article.

**Table 2 of the supplementary data.** Patients' baseline characteristics in the included studies

| Study and year                             | Age, years (median) | Male (%) | HBP (%) | DM (%) | Dyslipidemia (%) | Smoking (%) | Family History (%) | Prior MI (%) | Prior PCI (%) | Prior CABG (%) | ACS (%) | LVEF (median) |
|--------------------------------------------|---------------------|----------|---------|--------|------------------|-------------|--------------------|--------------|---------------|----------------|---------|---------------|
| NRSI                                       |                     |          |         |        |                  |             |                    |              |               |                |         |               |
| Wrongpraparut et al. 2005 <sup>23</sup>    | 60                  | 78       | 74      | 39     | 62               | 48          | N/A                | N/A          | N/A           | N/A            | 0       | 51            |
| Koo 2008 <sup>24</sup>                     | 62                  | 63       | N/A     | 26     | N/A              | N/A         | N/A                | N/A          | N/A           | N/A            | 63      | N/A           |
| Puymirat 2012 <sup>25</sup>                | 72                  | 65       | 63      | 31     | 65               | 43          | 31                 | N/A          | 39            | 12             | 18      | 67            |
| Di Serafino 2013 <sup>26</sup>             | 70                  | 77       | 57      | 27     | 63               | 43          | N/A                | 35           | 42            | 100            | 24      | 63            |
| Li 2013 <sup>27</sup>                      | 67                  | 69       | 78      | 29     | 78               | 13          | N/A                | 29           | 33            | N/A            | 11      | N/A           |
| Toth 2013 <sup>28</sup>                    | 68                  | 75       | 79      | 27     | 66               | 42          | 24                 | 16           | 32            | N/A            | 0       | 71            |
| Frohlich 2014 <sup>29</sup>                | 65                  | 74       | 52      | 22     | 49               | 16          | N/A                | 31           | 25            | 12             | 40      | N/A           |
| Di Gioia 2016 <sup>35</sup>                | 73                  | 70       | 57      | 24     | 54               | 34          | 27                 | N/A          | N/A           | 5              | 8       | 69            |
| De Backer 2016 <sup>36</sup>               | 65                  | 73       | 68      | 25     | 74               | 25          | 48                 | 34           | 46            | 15             | 0       | N/A           |
| Sawant 2018 <sup>13</sup>                  | 63                  | 76       | 83      | 33     | 93               | 17          | 38                 | 32           | 44            | 20             | N/A     | 57            |
| Fournier 2018 <sup>37</sup>                | 66                  | 80       | 76      | 21     | 65               | 45          | 26                 | 17           | N/A           | N/A            | 0       | 70            |
| Lunardi 2019 <sup>11</sup>                 | 84                  | 48       | 92      | 31     | N/A              | N/A         | N/A                | 19           | N/A           | 14             | N/A     | N/A           |
| Di Gioia 2020 <sup>14</sup>                | 67                  | 80       | 49      | 28     | 56               | 55          | 25                 | N/A          | 18            | 10             | 0       | 39            |
| Parikh 2020 <sup>38</sup>                  | 69                  | 97       | 89      | 45     | 86               | N/A         | 15                 | 22           | 24            | N/A            | 0       | 52            |
| Völz 2020 <sup>39</sup>                    | 66                  | 76       | 75      | 22     | 77               | 11          | N/A                | 28           | 32            | N/A            | 0       | N/A           |
| Omran 2020 <sup>42</sup>                   | 65                  | 65       | 78      | 43     | 70               | N/A         | N/A                | N/A          | N/A           | N/A            | 100     | N/A           |
| Wong 2021 <sup>40</sup>                    | 67                  | 73       | N/A     | 26     | N/A              | 42          | N/A                | 5            | N/A           | N/A            | 49      | N/A           |
| Adedj 2022 <sup>41</sup>                   | 68                  | 76       | 62      | 24     | 52               | 16          | 22                 | 17           | 41            | 2              | 0       | N/A           |
| Gerhardt 2023 <sup>44</sup>                | 69                  | 68       | 80      | 37     | 65               | N/A         | N/A                | N/A          | N/A           | N/A            | 100     | N/A           |
| Layland 2015 (FAMOUS-NSTEMI) <sup>30</sup> | 62                  | 74       | 45      | 15     | 36               | 41          | N/A                | 13           | 11            | N/A            | 100     | N/A           |
| Chen 2015 (DK-CRUSH VI) <sup>31</sup>      | 65                  | 74       | 69      | 28     | 18               | 41          | N/A                | 10           | 14            | <1             | 17      | 61            |
| Park 2015 (DEFER-DES) <sup>32</sup>        | 62                  | 73       | 64      | 26     | 70               | 26          | N/A                | 19           | 19            | N/A            | 51      | 62            |
| Van Nunen 2015 (FAME) <sup>33</sup>        | 64                  | 75       | 62      | 24     | 72               | 28          | 39                 | 36           | 27            | N/A            | N/A     | 57            |
| Zhang 2016 <sup>45</sup>                   | 70                  | 69       | 74      | 34     | 83               | 27          | N/A                | 24           | N/A           | N/A            | 100     | N/A           |
| Theusen 2018 (FARGO) <sup>12</sup>         | 66                  | 91       | 67      | 23     | 80               | 22          | 55                 | 25           | 21            | N/A            | 23      | N/A           |
| Toth 2019 (GRAFFITI) <sup>10</sup>         | 67                  | 81       | 74      | 37     | 79               | 49          | N/A                | 12           | 18            | N/A            | 11      | N/A           |
| Puymirat                                   | 62                  | 83       | 44      | 15     | 42               | 38          | 28                 | 6            | 9             | N/A            | 100     | 50            |

|                                        |    |    |    |    |    |     |     |    |    |     |     |     |
|----------------------------------------|----|----|----|----|----|-----|-----|----|----|-----|-----|-----|
| 2021<br>(FLOWER-MI)<br>5               |    |    |    |    |    |     |     |    |    |     |     |     |
| Rioufol 2021<br>(FUTURE) <sup>15</sup> | 66 | 83 | 59 | 31 | 60 | 24  | N/A | 20 | 26 | N/A | 46  | 55  |
| Stables 2022<br>(RIPCARD-2)<br>16      | 64 | 75 | 55 | 19 | 57 | N/A | N/A | 22 | 26 | N/A | 52  | N/A |
| Lee 2022<br>(FRAME-AMI)<br>43          | 63 | 84 | 53 | 33 | 41 | 33  | 7   | 3  | 6  | 0   | 100 | 53  |
|                                        |    |    |    |    |    |     |     |    |    |     |     |     |

ACS, acute coronary syndromes; CABG, coronary artery bypass grafting; DM, diabetes mellitus; HBP, high blood pressure; LVEF, left ventricular ejection fraction; MI, myocardial infarction; NRS, and non-randomized studies; PCI, percutaneous coronary intervention; RCT, randomized controlled trials.

The bibliographic citations included in the supplementary data correspond to the reference list included in the article.

**Table 3 of the supplementary data.** CABG anastomoses per patient

| <b>Study and year</b>       | <b>FFR (+/- SD)</b>                              | <b>Angio (+/- SD)</b>                            | <b>P value</b> |
|-----------------------------|--------------------------------------------------|--------------------------------------------------|----------------|
| <b>NRSI</b>                 |                                                  |                                                  |                |
| Toth 2013 <sup>28</sup>     | Arterial: 2 (1-2)<br>Venous: 1 (0-1)             | Arterial: 2 (1-2)<br>Venous: 1 (1-2)             | .068<br><.001  |
| Di Gioia 2016 <sup>35</sup> | Arterial: 0.84 +/- 0.73<br>Venous: 0.61 +/- 0.85 | Arterial: 0.86 +/- 0.72<br>Venous: 0.94 +/- 1.00 | .87<br>.032    |
| Fournier 2018 <sup>37</sup> | Arterial: 2 (1-2)<br>Venous: 0 (1-2)             | Arterial: 2 (1-2)<br>Venous: 0 (1-2)             | .717<br>.047   |
| Di Gioia 2020 <sup>14</sup> | Arterial: 1.53 +/- 0.68<br>Venous: 1.16 +/- 0.89 | Arterial: 1.43 +/- 0.79<br>Venous: 1.54 +/- 0.97 | .34<br>.007    |
| <b>RCT</b>                  |                                                  |                                                  |                |
| Theusen 2018 <sup>12</sup>  | Total: 2.6 +/- 0.9                               | Total: 3.0 +/- 0.9                               | .005           |
| Toth 2019 <sup>10</sup>     | Arterial: 1 (1-2)<br>Venous: 1 (0-2)             | Arterial: 1 (1-2)<br>Venous: 1 (1-2)             | .218<br>.031   |
| Rioufol 2021 <sup>15</sup>  | Total: 2.9 +/- 0.9                               | Total: 2.9 +/- 0.9                               | .81            |

CABG, coronary artery bypass grafting; FFR, fractional-flow reserve; NRSI, non randomized studies of intervention; RCT, randomized clinical trials; SD, standard deviation.

The bibliographic citations included in the supplementary data correspond to the reference list included in the article.

**Table 4 of the supplementary data.** PCI revascularizations according to the reported variables

| Study and year                 | Reported variable                   | FFR (+/- SD or %) | Angio (+/- SD or %) | P value             |
|--------------------------------|-------------------------------------|-------------------|---------------------|---------------------|
| <b>NRSI</b>                    |                                     |                   |                     |                     |
| Wongparat 2005 <sup>23</sup>   | PCI vessels per pt                  | 1.12 +/- 0.30     | 2.75 +/- 0.54       | <.001 <sup>a</sup>  |
| Koo 2008 <sup>24</sup>         | SB intervention                     | 33/110 (30%)      | 49/110 (45%)        | .03 <sup>a</sup>    |
| Puymirat 2012 <sup>25</sup>    | PCI vessels per pt                  | 1.10 +/- 1.01     | 1.17 +/- 0.03       | .044 <sup>a</sup>   |
| Di Serafino 2012 <sup>26</sup> | PCI performed                       | 23/65 (35%)       | 90/158 (57%)        | <.01 <sup>a</sup>   |
| Li 2013 <sup>27</sup>          | Stents per pt                       | 0.6 +/- 0.9       | 1.5 +/- 1.0         | <.001 <sup>a</sup>  |
| Frolich 2014 <sup>29</sup>     | Lesions attempted per pt            | 1.3 +/- 0.8       | 1.5 +/- 0.8         | <.0001 <sup>a</sup> |
| Di Gioia 2016 <sup>35</sup>    | PCI performed                       | 25/106 (24%)      | 28/212 (13%)        | .019 <sup>b</sup>   |
| De Backer 2016 <sup>36</sup>   | PCI lesions                         | 485/947 (51.2%)   | 957/957 (100%)      | .001 <sup>a</sup>   |
|                                | Total stent number                  | 486               | 951                 | <.001 <sup>o</sup>  |
| Lunardi 2019 <sup>11</sup>     | PCI performed                       | 24/94 (25.5%)     | 43/122 (35.2%)      | .19                 |
|                                | Lesions treated                     | 31/142 (21.8%)    | 54/184 (29.3%)      | .13                 |
| Di Gioia 2020 <sup>14</sup>    | PCI performed                       | 155/433 (36%)     | 261/866 (30%)       | .039 <sup>b</sup>   |
|                                | Stents per pt                       | 1.55 +/- 0.81     | 1.47 +/- 0.47       | .35                 |
| Parikh 2020 <sup>38</sup>      | PCI performed                       | 487/2967 (16.4%)  | 331/15 022 (2.2%)   | N/A                 |
| Volz 2020 <sup>39</sup>        | Stents per pt                       | 0.84 +/- 0.62     | 1.07 +/- 0.79       | .009 <sup>a</sup>   |
| Wong 2020 <sup>40</sup>        | More than 1 stent per single vessel | 74/542 (14%)      | 1855/9762 (19%)     | .002 <sup>a</sup>   |
| Omran 2020 <sup>42</sup>       | Total number of stents used         | 55                | 54.5                | .34                 |
| Adjedj 2022 <sup>41</sup>      | Number of stents implanted          | 1.48 ± 0.81       | 1.47 ± 0.85         | .208                |
| Gerhardt 2023 <sup>44</sup>    | Number of stents                    | 1.48              | 1.60                | .175                |
| <b>RCT</b>                     |                                     |                   |                     |                     |
| Layland 2015 <sup>30</sup>     | PCI performed                       | 125/176 (71%)     | 139/174 (79.9%)     | .057                |
| Chen 2015 <sup>31</sup>        | SB intervention                     | 30/160 (25.9)     | 61/160 (38.1)       | .01 <sup>a</sup>    |
| Park 2015 <sup>32</sup>        | Total stent number                  | 53/114            | 187/115             | N/A                 |
| Van Nunen 2015 <sup>33</sup>   | DES per pt                          | 1.9 +/- 1.3       | 2.7 +/- 1.2         | <.001 <sup>a</sup>  |
|                                | Lesions stented                     | 819 (94%)         | 1237 (92%)          | .07                 |
| Zhang 2016 <sup>45</sup>       | PCI performed                       | 95/110 (86.4%)    | 104/110 (94.5%)     | N/A                 |
| Puymirat 2021 <sup>5</sup>     | Non-culprit PCI performed           | 388/586 (66.2%)   | 560/577 (97.1%)     | N/A                 |
|                                | Stents per pt                       | 1.01 +/- 0.99     | 1.50 +/- 0.86       | N/A                 |
| Rioufol 2021 <sup>15</sup>     | Stents per pt                       | 2.2 +/- 1.2       | 2.1 +/- 1.2         | .54                 |
| Stables 2022 <sup>16</sup>     | PCI/CABG performed                  | 373/548 (68.0%)   | 387/552 (70.1%)     | .2                  |
| Lee 2022 <sup>43</sup>         | PCI of NCL                          | 64.1              | 97.1                | °<.001              |

CABG, coronary artery bypass grafting; FFR, fractional-flow reserve; NCL, non-culprit lesion; NRSI, non-randomized studies of intervention; PCI, percutaneous coronary intervention; RCT, SB, side branch; SD, standard deviation.

<sup>a</sup> Favours FFR.

<sup>b</sup> Favours angio.



The bibliographic citations included in the supplementary data correspond to the reference list included in the article.

**Table 5 of the supplementary data.** Studies including periprocedural events in MI definition

| Study and year                             | FFR vs Angio | Periprocedural definitions | MI |
|--------------------------------------------|--------------|----------------------------|----|
| <b>Non-randomized studies</b>              |              |                            |    |
| Wrongpraparut et al. 2005 <sup>23</sup>    | 1 vs 2       | Q wave/non-Q wave          |    |
| Koo 2008 <sup>24</sup>                     | 9 vs 16      | N/A                        |    |
| Puymirat 2012 <sup>25</sup>                | 0 vs 24      | UDMI                       |    |
| Di Serafino 2013 <sup>26</sup>             | 1 vs 18      | N/A                        |    |
| Li 2013 <sup>27</sup>                      | N/A          | N/A                        |    |
| Toth 2013 <sup>28</sup>                    | N/A          | N/A                        |    |
| Frohlich 2014 <sup>29</sup>                | N/A*         | N/A                        |    |
| Di Gioia 2016 <sup>35</sup>                | N/A          | N/A                        |    |
| De Backer 2016 <sup>36</sup>               | 6 vs 13      | UDMI                       |    |
| Sawant 2018 <sup>13</sup>                  | 6 vs 3       | N/A                        |    |
| Fournier 2018 <sup>37</sup>                | N/A          | N/A                        |    |
| Lunardi 2019 <sup>11</sup>                 | 3 vs 7       | UDMI                       |    |
| Di Gioia 2020 <sup>14</sup>                | N/A          | N/A                        |    |
| Parikh 2020 <sup>38</sup>                  | N/A          | N/A                        |    |
| Völz 2020 <sup>39</sup>                    | N/A          | N/A                        |    |
| Omran 2020 <sup>42</sup>                   | N/A          | N/A                        |    |
| Wong 2021 <sup>40</sup>                    | N/A          | N/A                        |    |
| Adjedj 2022 <sup>41</sup>                  | N/A          | UDMI                       |    |
| Gerhardt 2023 <sup>44</sup>                | N/A          | N/A                        |    |
| <b>Randomized studies</b>                  |              |                            |    |
| Layland 2015 (FAMOUS-NSTEMI) <sup>30</sup> | 5 vs 11      | UDMI                       |    |
| Chen 2015 (DK-CRUSH VI) <sup>31</sup>      | 19 vs 20     | Q wave/non-Q wave          |    |
| Park 2015 (DEFER-DES) <sup>32</sup>        | N/A          | N/A                        |    |
| Van Nunen 2015 (FAME) <sup>33</sup>        | 12 vs 16     | UDMI                       |    |
| Zhang 2016 <sup>45</sup>                   | N/A          | N/A                        |    |
| Theusen 2018 (FARGO) <sup>12</sup>         | N/A          | UDMI                       |    |
| Toth 2019 (GRAFFITI) <sup>10</sup>         | N/A          | N/A                        |    |
| Puymirat 2021 (FLOWER-MI) <sup>5</sup>     | 7 vs 2       | UDMI                       |    |
| Rioufol 2021 (FUTURE) <sup>15</sup>        | N/A          | N/A                        |    |
| Stables 2022 (RIPCARD-2) <sup>16</sup>     | N/A          | N/A                        |    |
| Lee 2022 (FRAME-AMI) <sup>43</sup>         | 3 vs 11      | UDMI                       |    |

FFR, fractional flow reserve; MI, UDMI, universal definition of myocardial infarction

\*missing in the PSWM (propensity score weighted matching) adjusted cohorts

The bibliographic citations included in the supplementary data correspond to the reference list included in the article.

Figure 1 of the supplementary data. PRISMA diagram

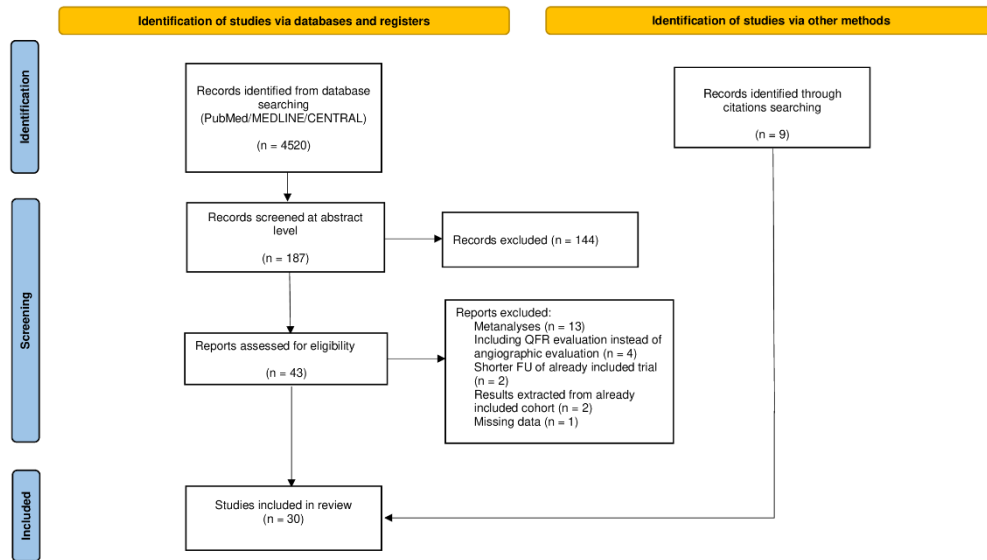

From: Page MJ, McKenzie JE, Bossuyt PM, Boutron I, Hoffmann TC, Mulrow CD, et al. The PRISMA 2020 statement: an updated guideline for reporting systematic reviews. BMJ 2021;372:n71. doi: 10.1136/bmj.n71. For more information, visit: <http://www.prisma-statement.org>

Figure 2 of the supplementary data. RoB 2 for RCTs diagram

|       |                | Risk of bias domains |    |    |    |    |         |
|-------|----------------|----------------------|----|----|----|----|---------|
|       |                | D1                   | D2 | D3 | D4 | D5 | Overall |
| Study | Layland 2015   |                      |    |    |    |    |         |
|       | Van Nunen 2015 |                      |    |    |    |    |         |
|       | Park 2015      |                      |    |    |    |    |         |
|       | Chen 2015      |                      |    |    |    |    |         |
|       | Zhang 2016     |                      |    |    |    |    |         |
|       | Theusen 2018   |                      |    |    |    |    |         |
|       | Toth 2019      |                      |    |    |    |    |         |
|       | Puymirat 2021  |                      |    |    |    |    |         |
|       | Rioufol 2021   |                      |    |    |    |    |         |
|       | Lee 2022       |                      |    |    |    |    |         |
|       | Stables 2022   |                      |    |    |    |    |         |

Domains:  
D1: Bias arising from the randomization process.  
D2: Bias due to deviations from intended intervention.  
D3: Bias due to missing outcome data.  
D4: Bias in measurement of the outcome.  
D5: Bias in selection of the reported result.

Judgement  
 Some concerns  
 Low

The bibliographic references mentioned in this figure correspond to: 2, 15, 16, 30, 31, 32, 33, 43, 45

Puymirat *et al.*<sup>5</sup>, Toth *et al.*<sup>10</sup>, Thuesen *et al.*<sup>12</sup>, Rioufol *et al.*<sup>15</sup>, Stables *et al.*<sup>16</sup>, Layland *et al.*<sup>30</sup>, Chen *et al.*<sup>31</sup>, Park *et al.*<sup>32</sup>, Van Nunen *et al.*<sup>33</sup>, Lee *et al.*<sup>43</sup>, Zhang *et al.*<sup>45</sup>.

RCT (randomized clinical trials).

The bibliographic citations included in the supplementary data correspond to the reference list included in the article.

Figure 3 of the supplementary data. ROBINS-I for NRSI diagram

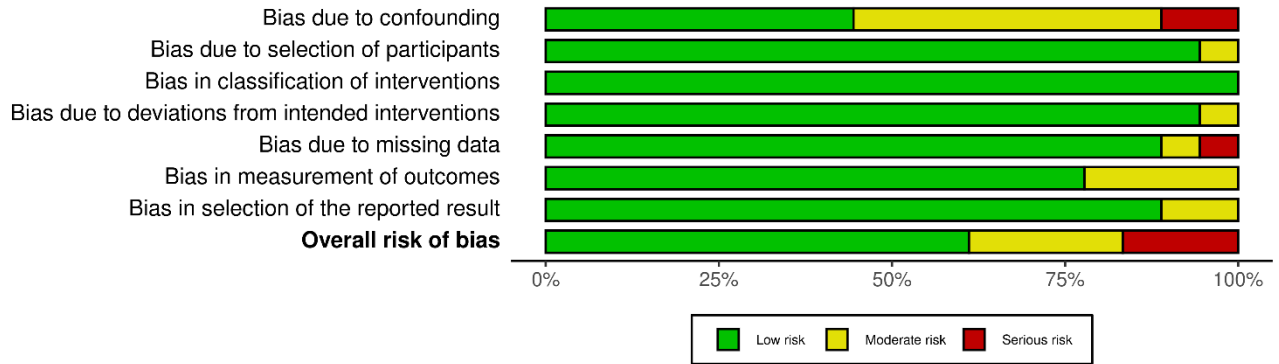

NRSI, non-randomized studies of intervention.

Figure 4 of the supplementary data. All-cause mortality funnel plot (Egger's test for primary analysis:

$P = .288$ ; Egger's test for secondary analysis:  $P = .301$ )

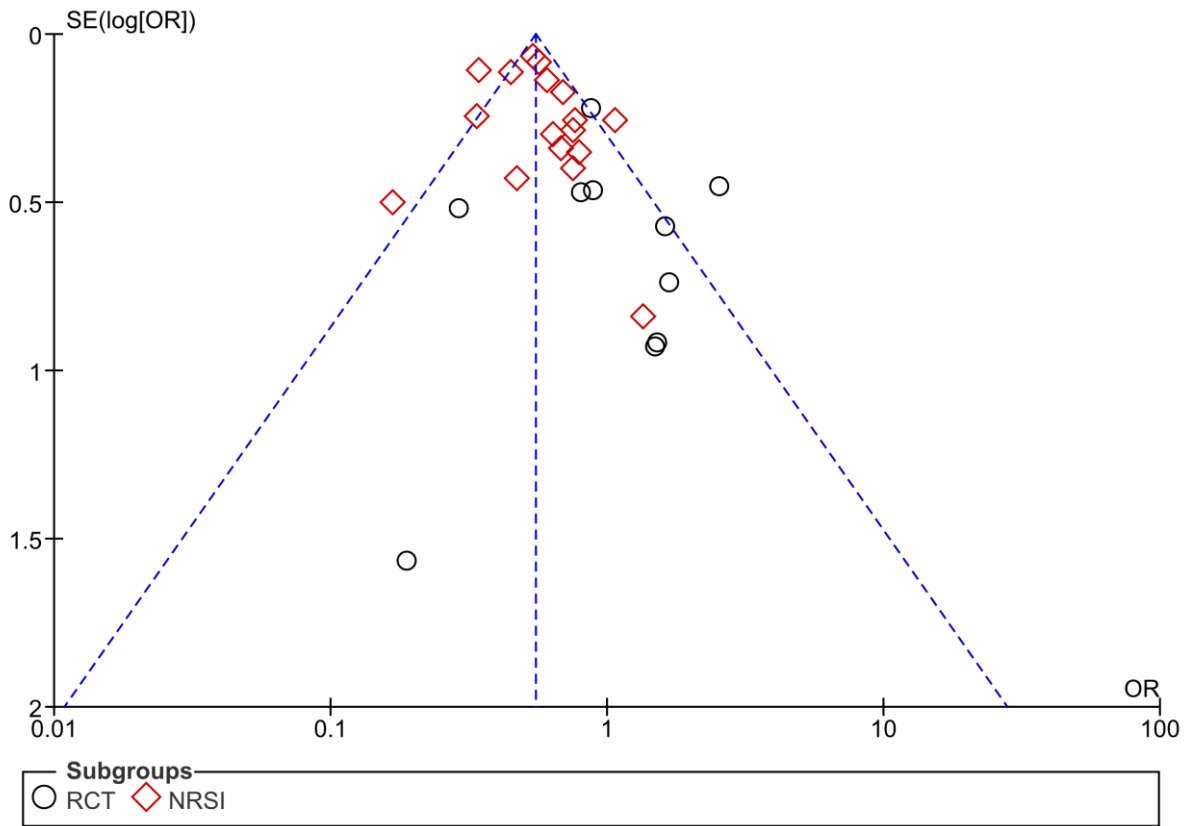

NRSI, non-randomized studies of intervention; OR, odds ratio; RCT, randomized clinical trials.

Figure 5 of the supplementary data. MI funnel plot (Egger's test for primary analysis:  $P = .628$ ; Egger's test for secondary analysis:  $P = .506$ )

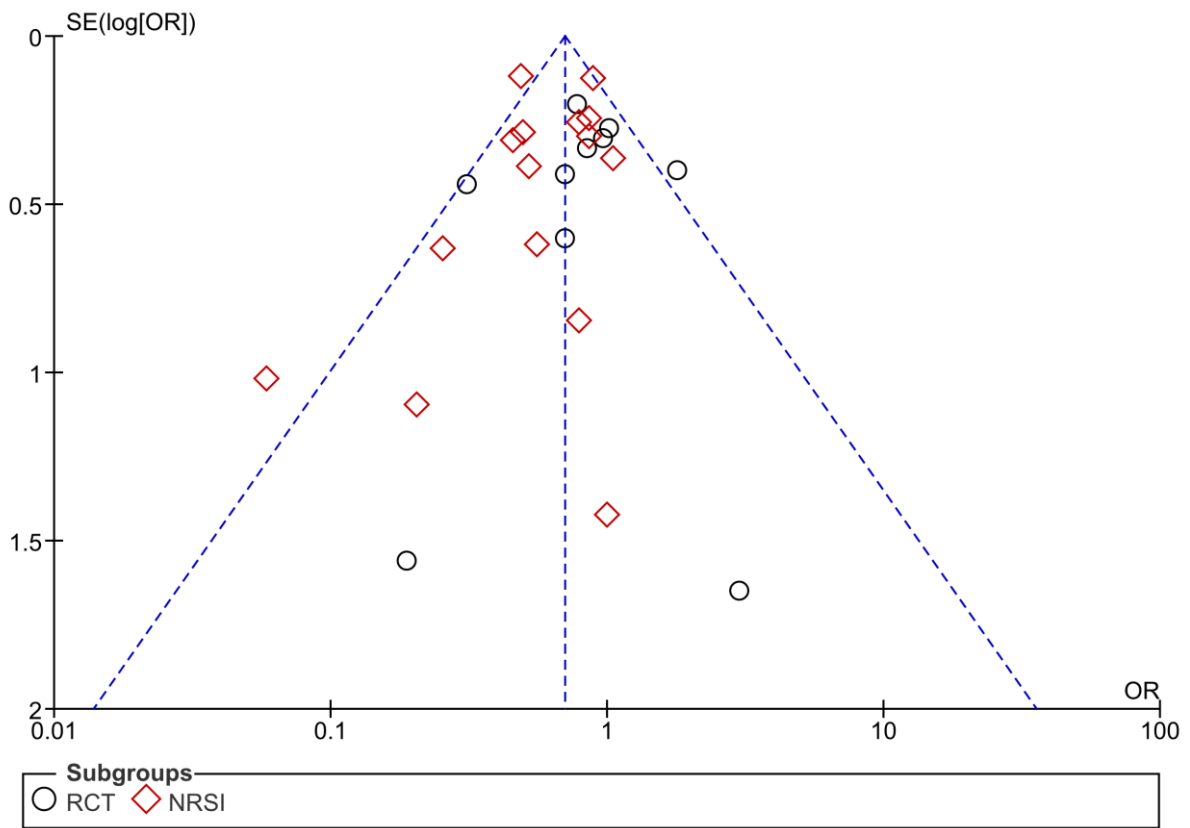

NRSI, non-randomized studies of intervention; OR, odds ratio; RCT, randomized clinical trials.

**Figure 6 of the supplementary data.** MACE funnel plot (Egger's test for primary analysis:  $P = .886$ ; Egger's test for secondary analysis:  $P = .619$ )

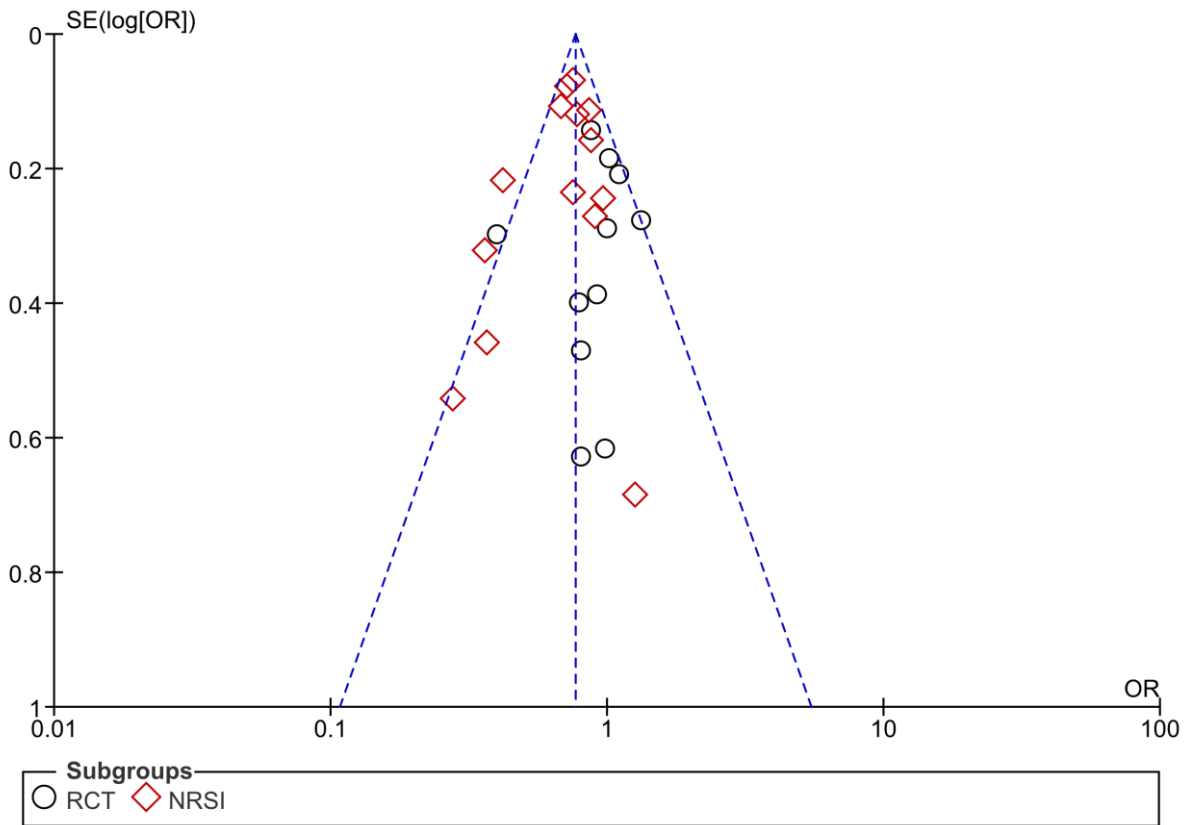

NRSI, non-randomized studies of intervention; OR, odds ratio; RCT, randomized clinical trials.



Figure 7 of the supplementary data. Secondary analysis for all-cause mortality

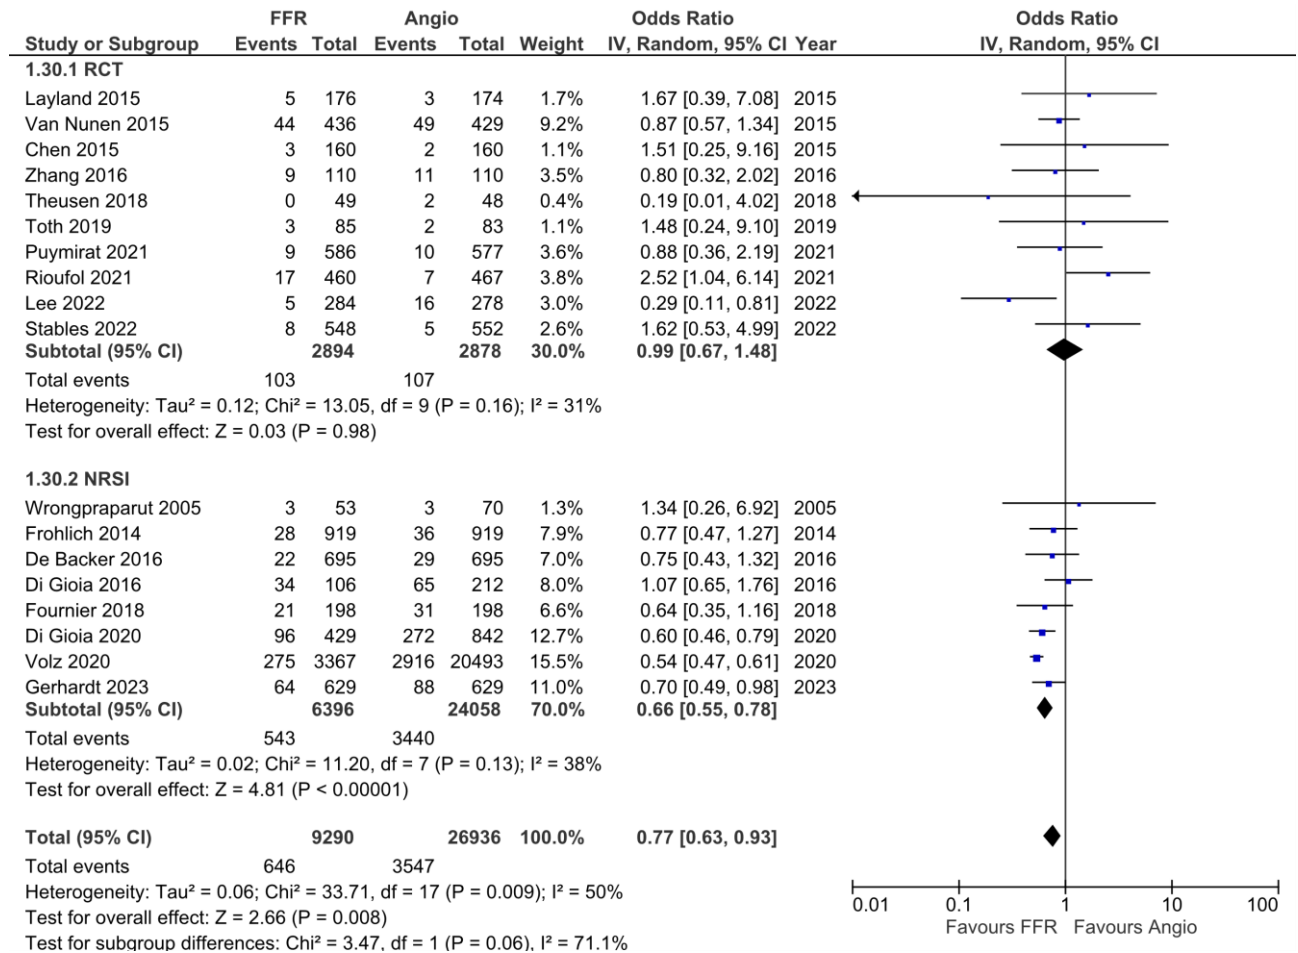

95%CI, 95% confidence intervals; FFR, fractional flow reserve; NRSI, non-randomized studies of intervention; RCT, randomized clinical trials.

The bibliographic references mentioned in this figure correspond to: Puymirat *et al.*<sup>5</sup>, Toth *et al.*<sup>10</sup>, Thuesen *et al.*<sup>12</sup>, Di Gioia *et al.*<sup>14</sup>, Rioufol *et al.*<sup>15</sup>, Stables *et al.*<sup>16</sup>, Wongpraparut<sup>23</sup>, Fröhlich *et al.*<sup>29</sup>, Layland *et al.*<sup>30</sup>, Chen *et al.*<sup>31</sup>, Van Nunen *et al.*<sup>33</sup>, Di Gioia *et al.*<sup>35</sup>, De Backer *et al.*<sup>36</sup>, Fournier *et al.*<sup>37</sup>, Völz *et al.*<sup>39</sup>, Lee *et al.*<sup>43</sup>, Gerhardt *et al.*<sup>44</sup>, Zhang *et al.*<sup>45</sup>.

The bibliographic citations included in the supplementary data correspond to the reference list included in the article.

Figure 8 of the supplementary data. Secondary analysis for MI

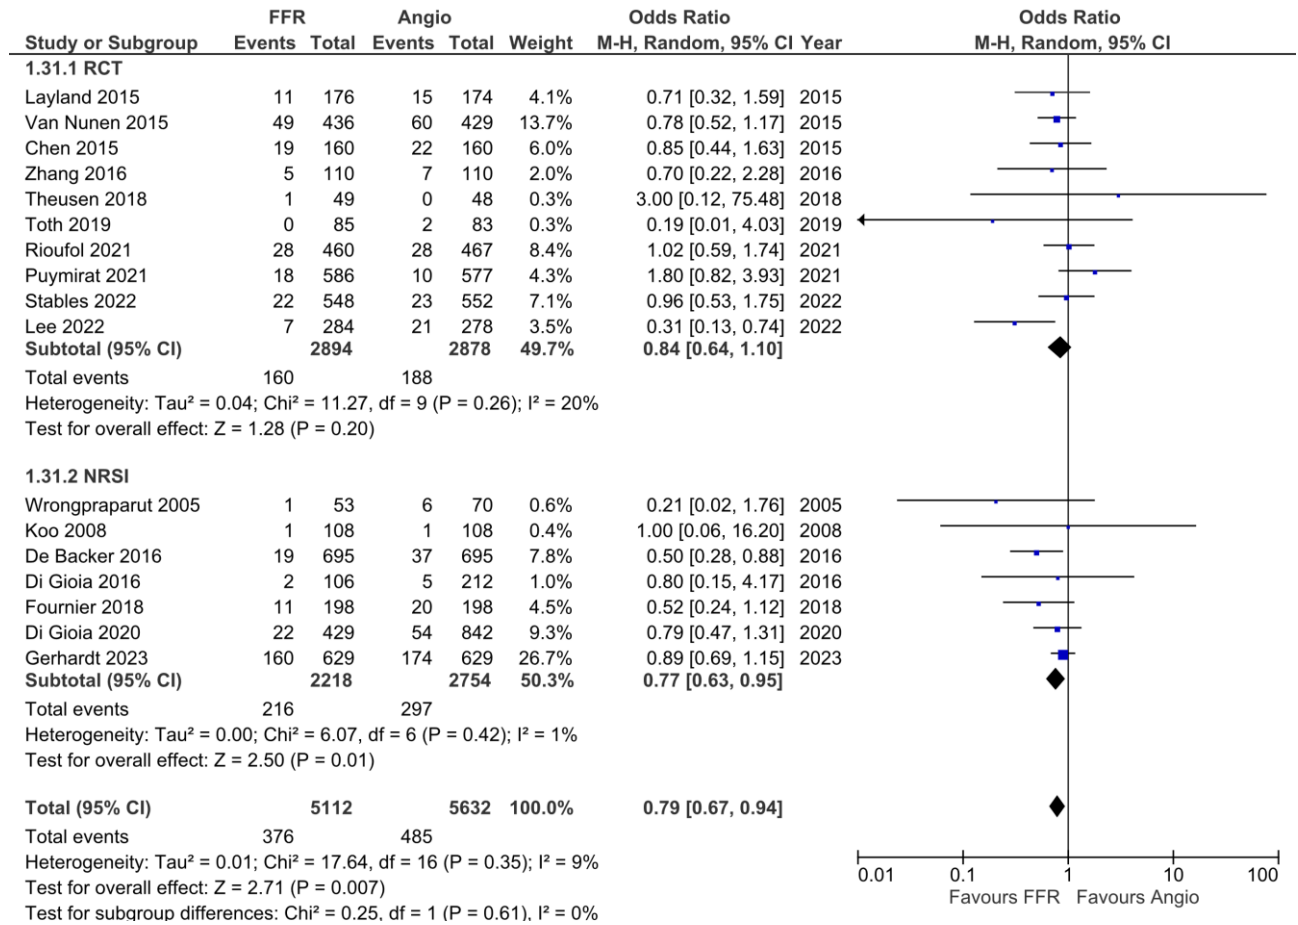

95%CI, 95% confidence intervals; FFR, fractional flow reserve; NRSI, non-randomized studies of intervention; RCT, randomized clinical trials.

The bibliographic references mentioned in this figure correspond to: Puymirat *et al.*<sup>5</sup>, Toth *et al.*<sup>10</sup>, Thuesen *et al.*<sup>12</sup>, Di Gioia *et al.*<sup>14</sup>, Rioufol *et al.*<sup>15</sup>, Stables *et al.*<sup>16</sup>, Wongpraparut *et al.*<sup>23</sup>, Koo *et al.*<sup>24</sup>, Layland *et al.*<sup>30</sup>, Chen *et al.*<sup>31</sup>, Van Nunen *et al.*<sup>33</sup>, Di Gioia *et al.*<sup>35</sup>, De Backer *et al.*<sup>36</sup>, Fournier *et al.*<sup>37</sup>, Lee *et al.*<sup>43</sup>, Gerhardt *et al.*<sup>44</sup>, Zhang *et al.*<sup>45</sup>.

The bibliographic citations included in the supplementary data correspond to the reference list included in the article.

Figure 9 of the supplementary data. Secondary analysis for MACE

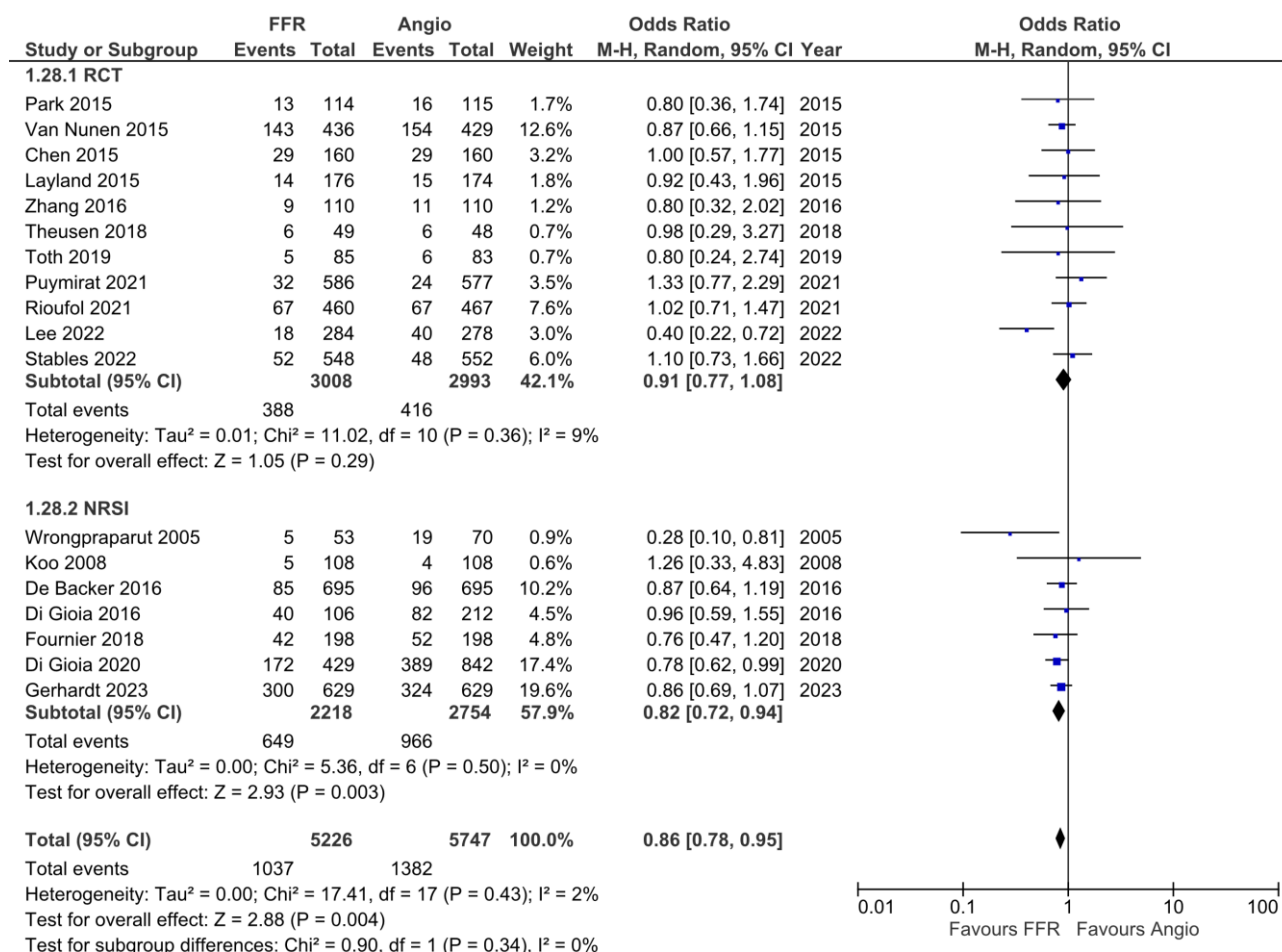

95%CI, 95% confidence intervals; FFR, fractional flow reserve; NRSI, non-randomized studies of intervention; RCT, randomized clinical trials.

The bibliographic references mentioned in this figure correspond to: Puymirat *et al.*<sup>5</sup>, Toth *et al.*<sup>10</sup>, Thuesen *et al.*<sup>12</sup>, Di Gioia *et al.*<sup>14</sup>, Rioufol *et al.*<sup>15</sup>, Stables *et al.*<sup>16</sup>, Wongpraparut *et al.*<sup>23</sup>, Layland *et al.*<sup>30</sup>, Chen *et al.*<sup>31</sup>, Park *et al.*<sup>32</sup>, Van Nunen *et al.*<sup>33</sup>, Di Gioia *et al.*<sup>35</sup>, De Backer *et al.*<sup>36</sup>, Fournier *et al.*<sup>37</sup>, Lee *et al.*<sup>43</sup>, Zhang *et al.*<sup>45</sup>.

The bibliographic citations included in the supplementary data correspond to the reference list included in the article.

Figure 10 of the supplementary data. Forest plot analysis for any revascularization

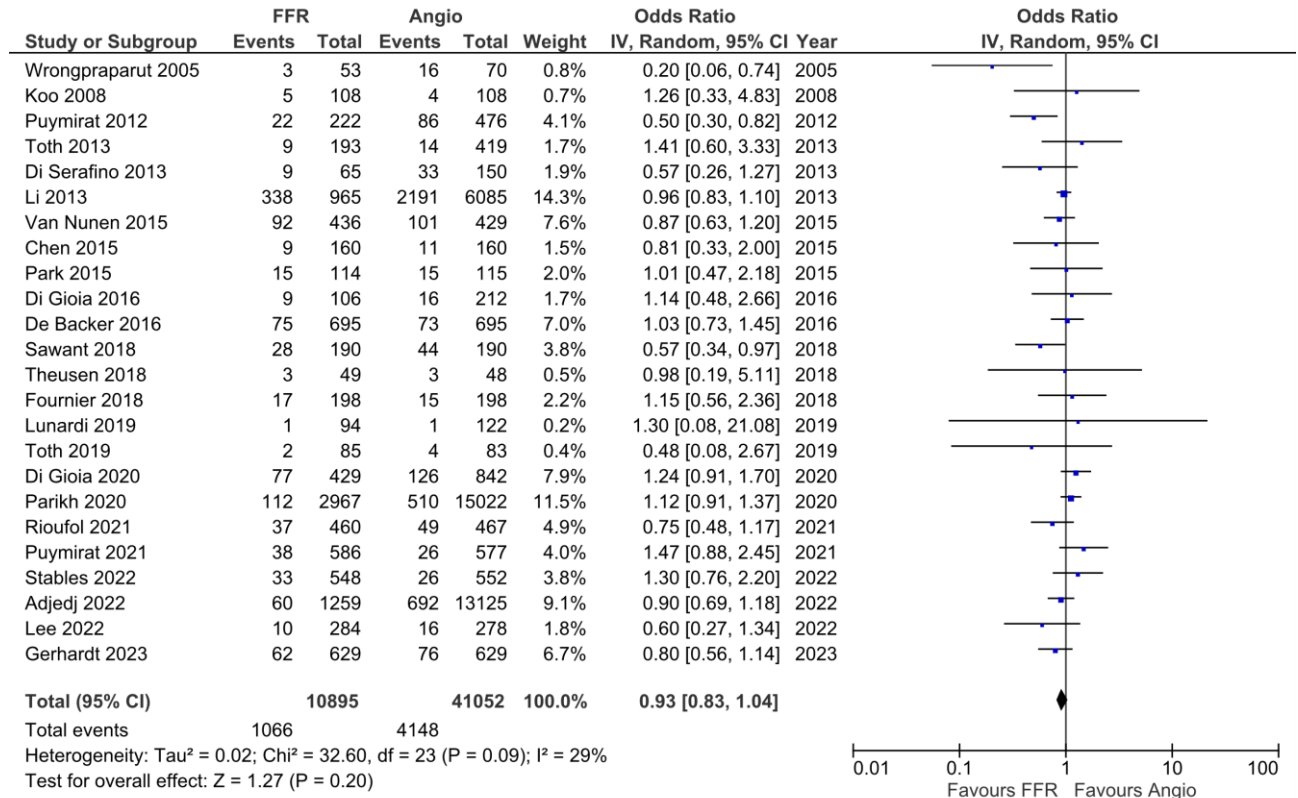

95%CI, confidence intervals; FFR, fractional flow reserve; NRSI, nonrandomized studies of intervention; RCT, randomized clinical trials.

The bibliographic references mentioned in this figure correspond to: Puymirat *et al.*<sup>5</sup>, Toth *et al.*<sup>10</sup>, Lunardi *et al.*<sup>11</sup>, Thuesen *et al.*<sup>12</sup>, Sawant *et al.*<sup>13</sup>, Di Gioia *et al.*<sup>14</sup>, Rioufol *et al.*<sup>15</sup>, Stables *et al.*<sup>16</sup>, Wongpraparut *et al.*<sup>23</sup>, Koo *et al.*<sup>24</sup>, Puymirat *et al.*<sup>25</sup>, Di Serafino *et al.*<sup>26</sup>, Li *et al.*<sup>27</sup>, Toth *et al.*<sup>28</sup>, Chen *et al.*<sup>31</sup>, Park *et al.*<sup>32</sup>, Van Nunen *et al.*<sup>33</sup>, De Backer *et al.*<sup>36</sup>, Fournier *et al.*<sup>37</sup>, Parikh *et al.*<sup>38</sup>, Adjedj *et al.*<sup>41</sup>, Lee *et al.*<sup>43</sup>, Gerhardt *et al.*<sup>44</sup>.

The bibliographic citations included in the supplementary data correspond to the reference list included in the article.

Figure 11 of the supplementary data. Forest plot analysis for TVR/TLR (fixed model)

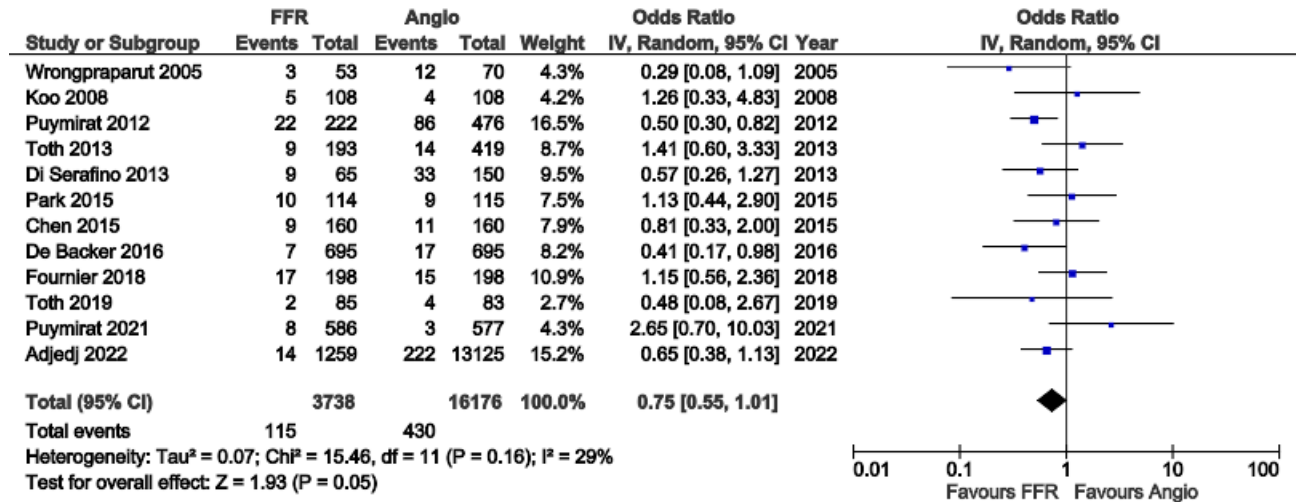

95%CI, confidence intervals; FFR, fractional flow reserve; TLR, target lesion revascularization; TVR, target vessel revascularization.

The bibliographic references mentioned in this figure correspond to: Puymirat *et al.*<sup>5</sup>, Toth *et al.*<sup>10</sup>, Wongpraparut *et al.*<sup>23</sup>, Koo *et al.*<sup>24</sup>, Puymirat *et al.*<sup>25</sup>, Di Serafino *et al.*<sup>26</sup>, Toth *et al.*<sup>28</sup>, Chen *et al.*<sup>31</sup>, Park *et al.*<sup>32</sup>, De Backer *et al.*<sup>36</sup>, Fournier *et al.*<sup>37</sup>.

The bibliographic citations included in the supplementary data correspond to the reference list included in the article.

Figure 12 of the supplementary data. Forest plot analysis for periprocedural MI

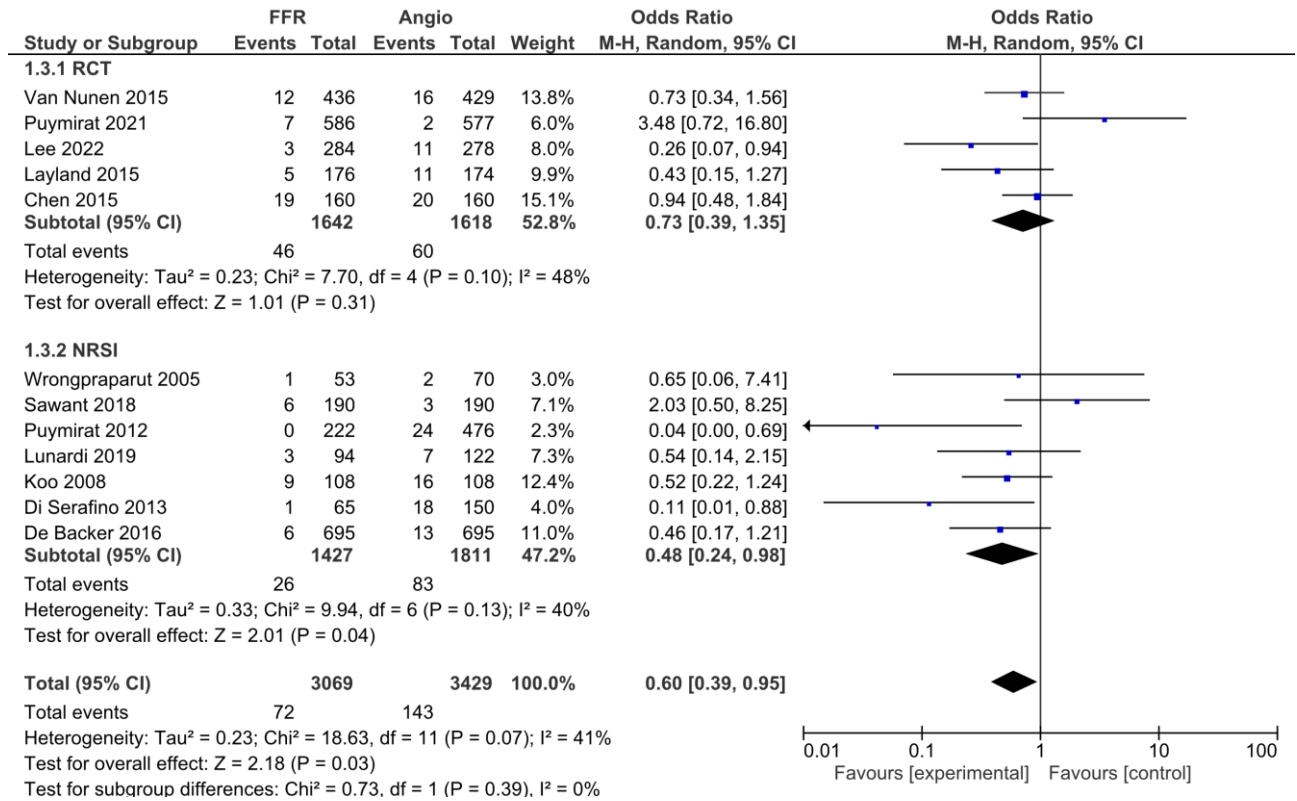

95%CI, 95% confidence intervals; FFR, fractional flow reserve; MI, myocardial infarction; NRSI, non-randomized studies of intervention; RCT, randomized clinical trials.

The bibliographic references mentioned in this figure correspond to: Puymirat *et al.*<sup>5</sup>, Lunardi *et al.*<sup>11</sup>, Sawant *et al.*<sup>13</sup>, Wongpraparut *et al.*<sup>23</sup>, Koo *et al.*<sup>24</sup>, Puymirat *et al.*<sup>25</sup>, Di Serafino *et al.*<sup>26</sup>, Layland *et al.*<sup>30</sup>, Chen *et al.*<sup>31</sup>, Van Nunen *et al.*<sup>33</sup>, De Backer *et al.*<sup>36</sup>, Lee *et al.*<sup>43</sup>.

The bibliographic citations included in the supplementary data correspond to the reference list included in the article.
